# Supplementary material for: Lipids constituents from Gardenia aqualla Stapf & Hutch
Source: publisher site journal article supplement (doi:10.1515/chem-2018-0035), 2018-01-01
Supplement: Supplementary file 1 [file chem-2018-0035_sm.pdf]

## Supplementary Information

## Open Access

Jean Noël Nyemb\*, Larissa Mekontso Magnibou, Emmanuel Talla, Alembert Tiabou Tchinda, Roland Tchuente Tchuenguem, Celine Henoumont, Sophie Laurent, Joseph Tanyi Mbafor

## Supplement: Lipids constituents from *Gardenia aqualla* Stapf & Hutch

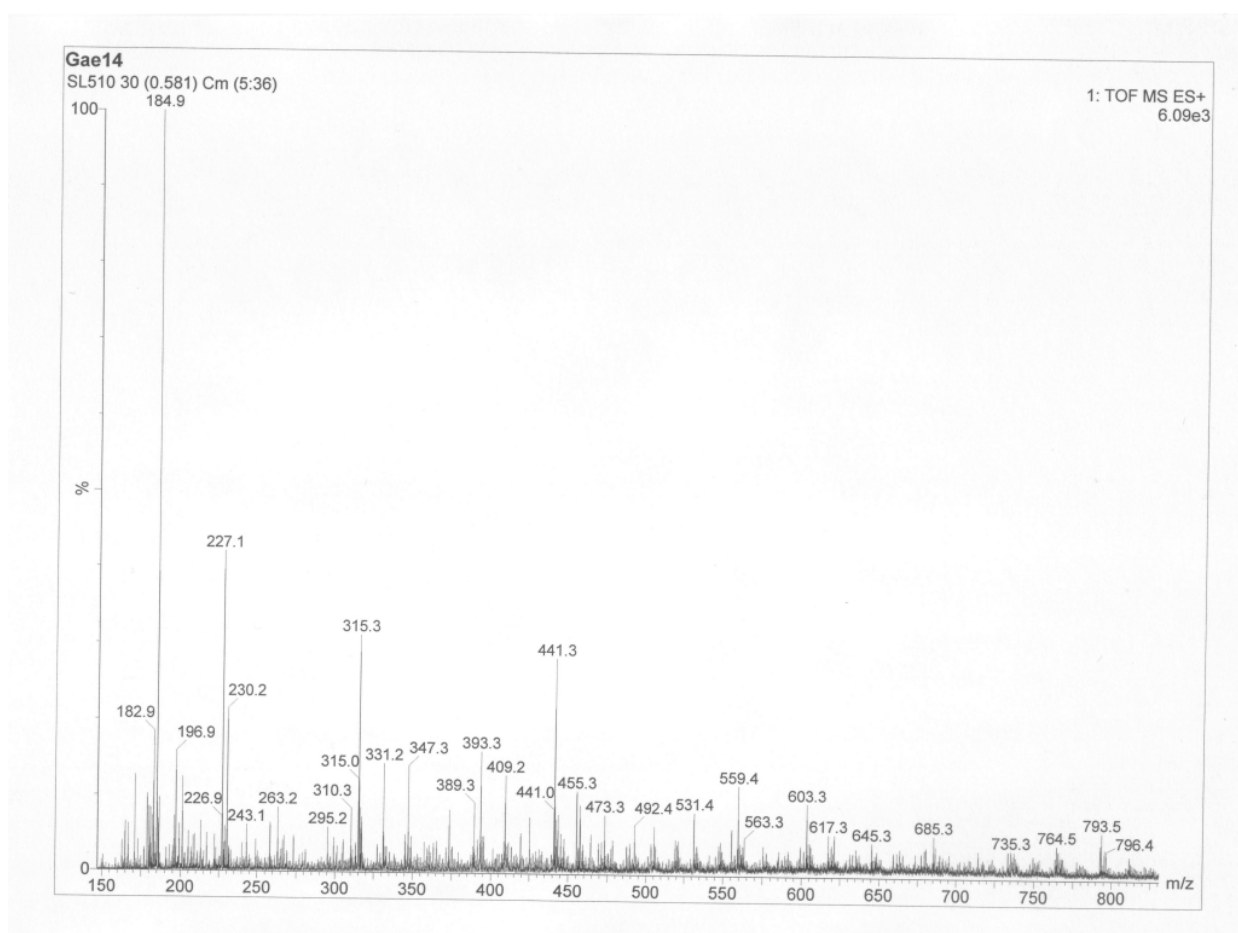

Figure S1. ESI-TOF MS+ spectrum of Compound 4

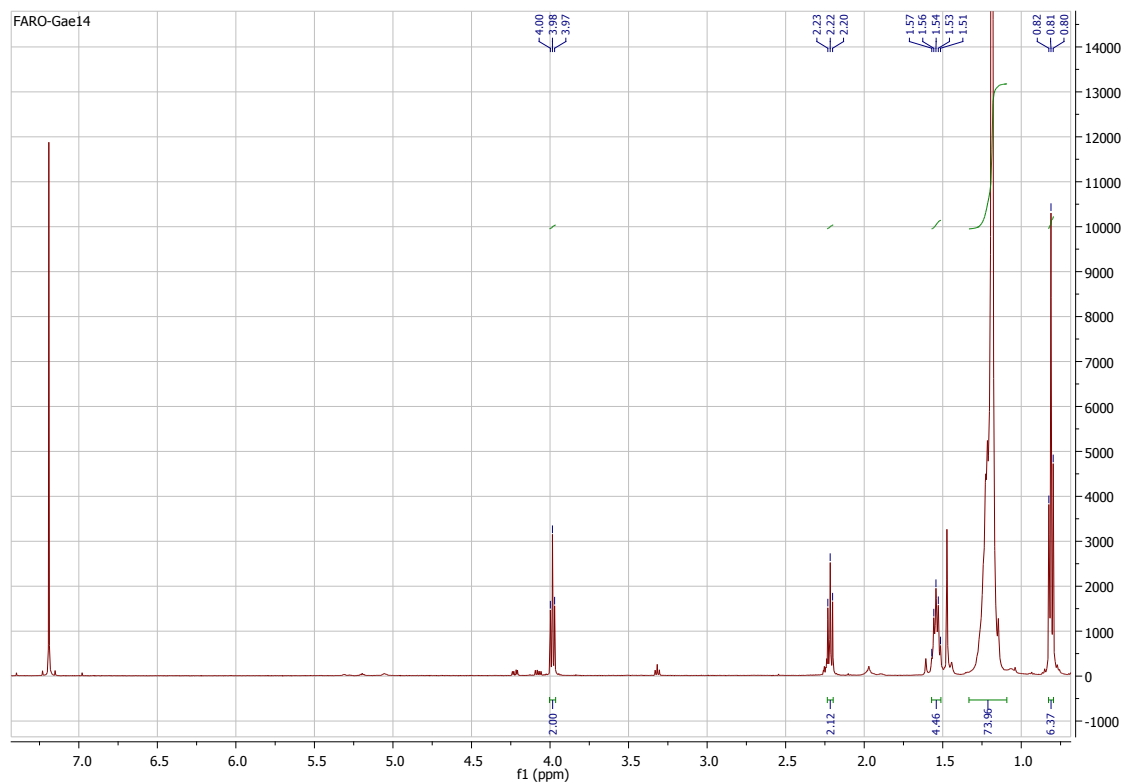

Figure S2. <sup>1</sup>H NMR spectra of compound 4 in CDCl<sub>3</sub>

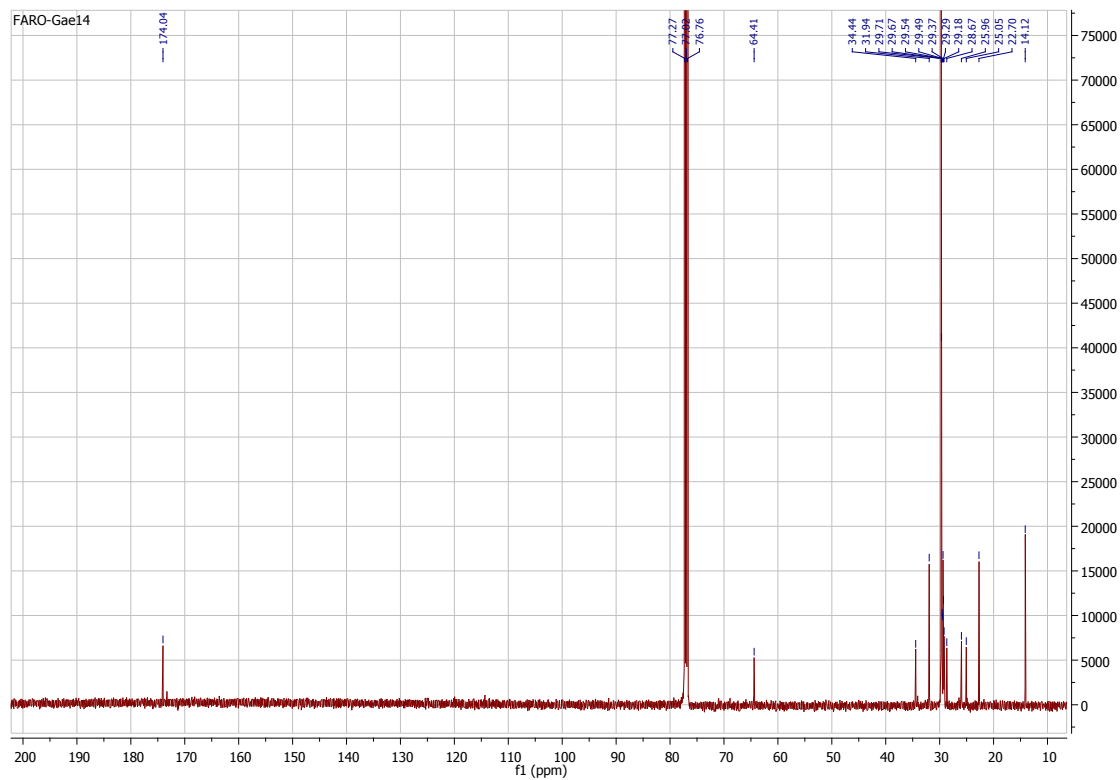

Figure S3. <sup>13</sup>C NMR spectra of compound 4 in CDCl<sub>3</sub>

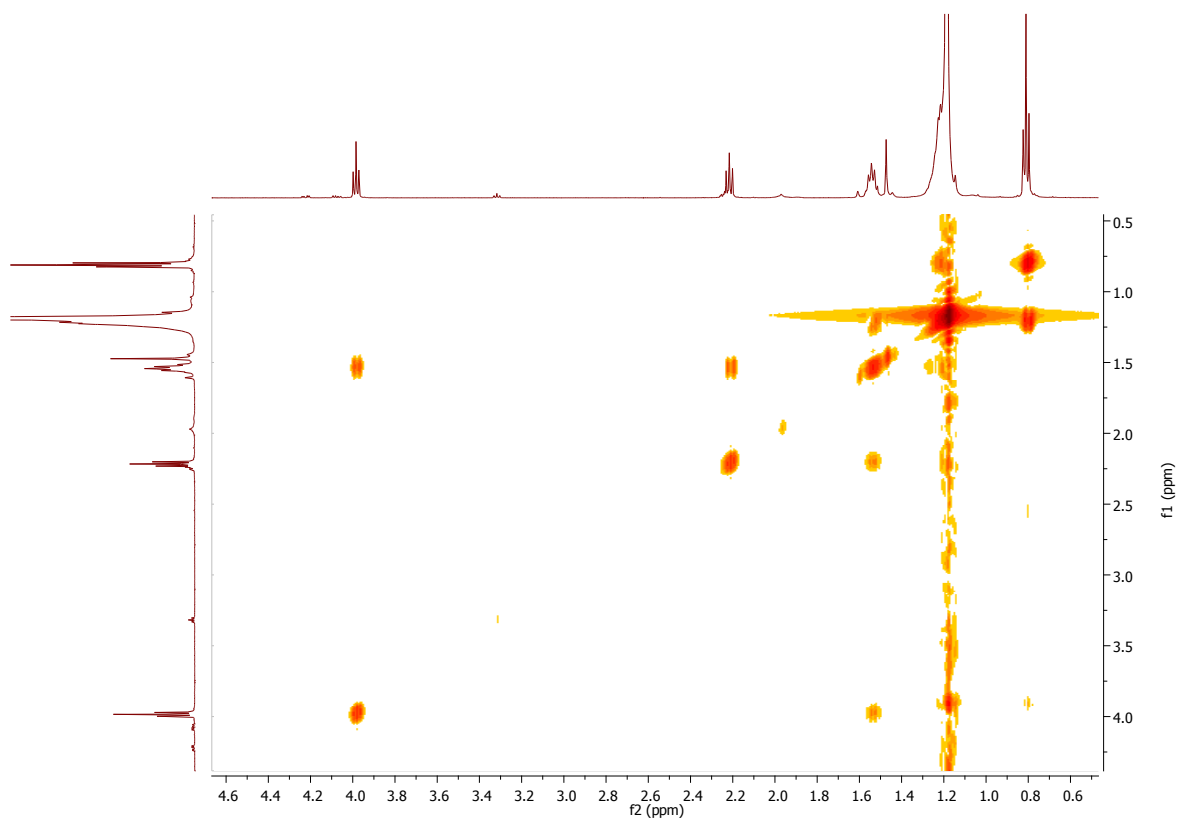

Figure S4. COSY spectra of compound 4 in CDCl<sub>3</sub>

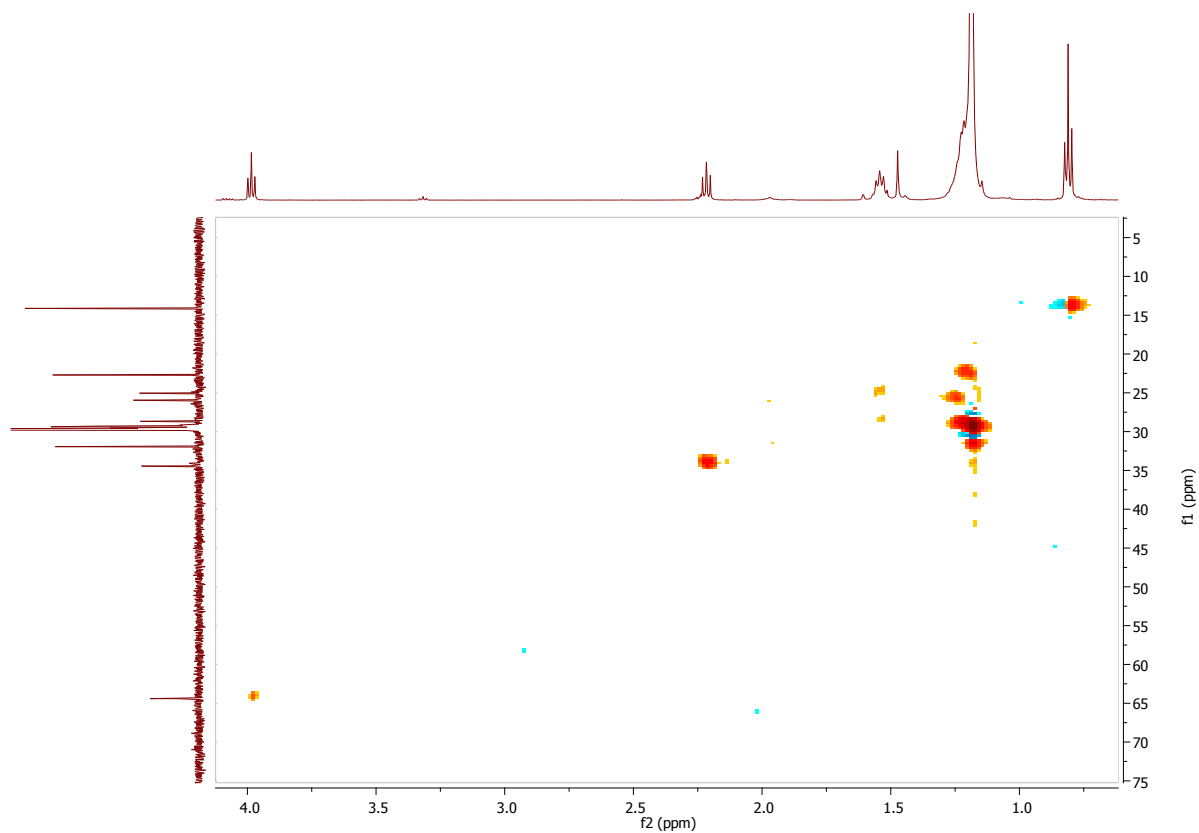

Figure S5. HSQC spectra of compound 4 in CDCl<sub>3</sub>

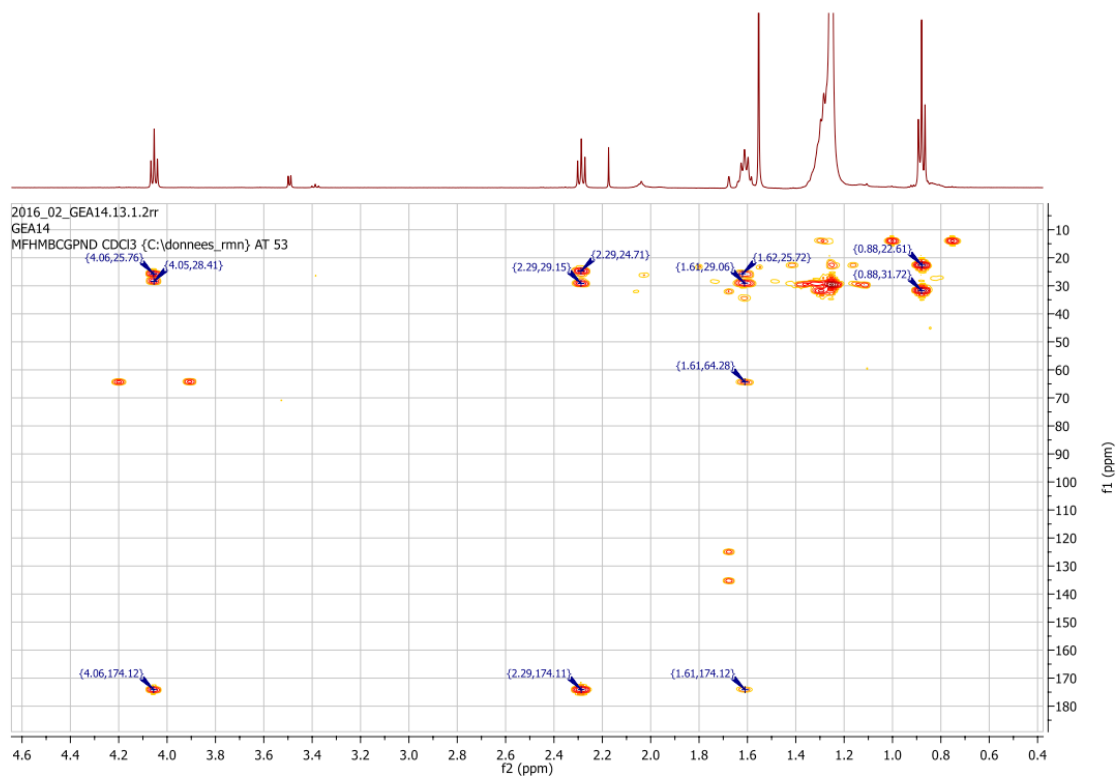Figure S6. HMBC spectra of compound **4** in  $\text{CDCl}_3$ 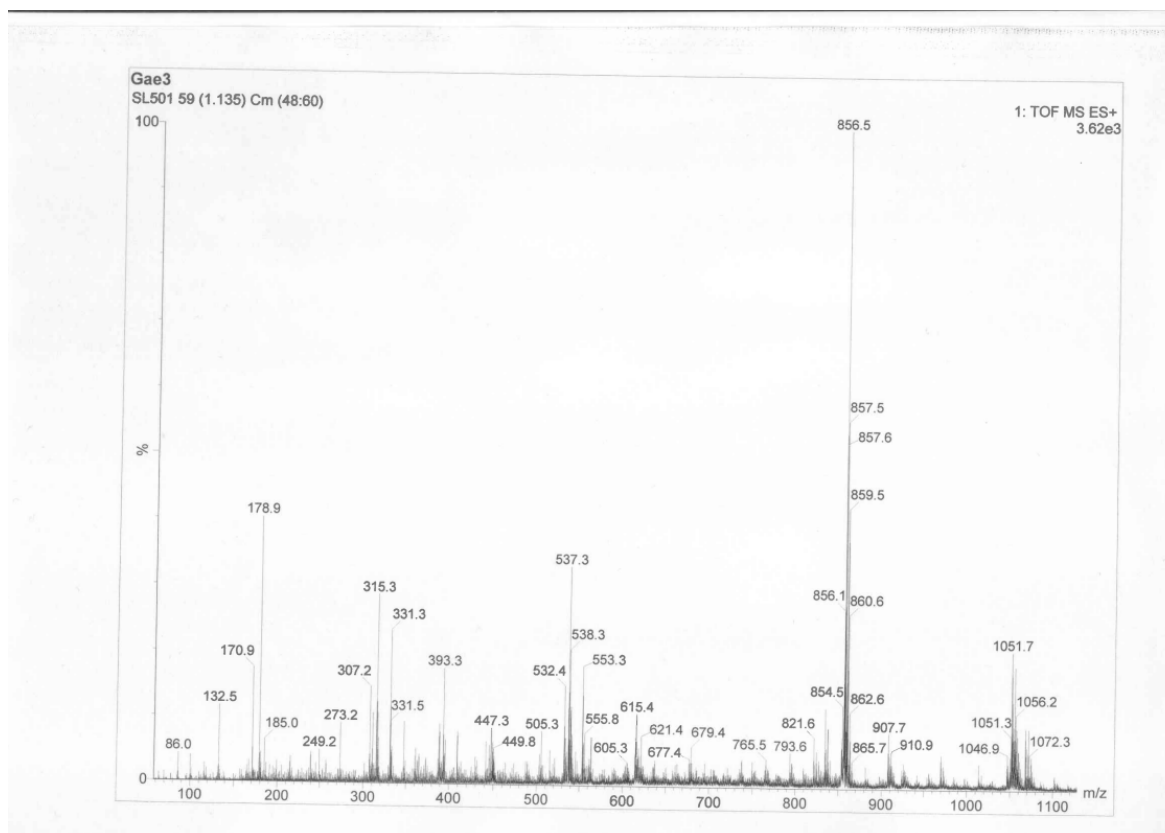Figure S7. ESI-TOF MS spectrum of Compound **1**

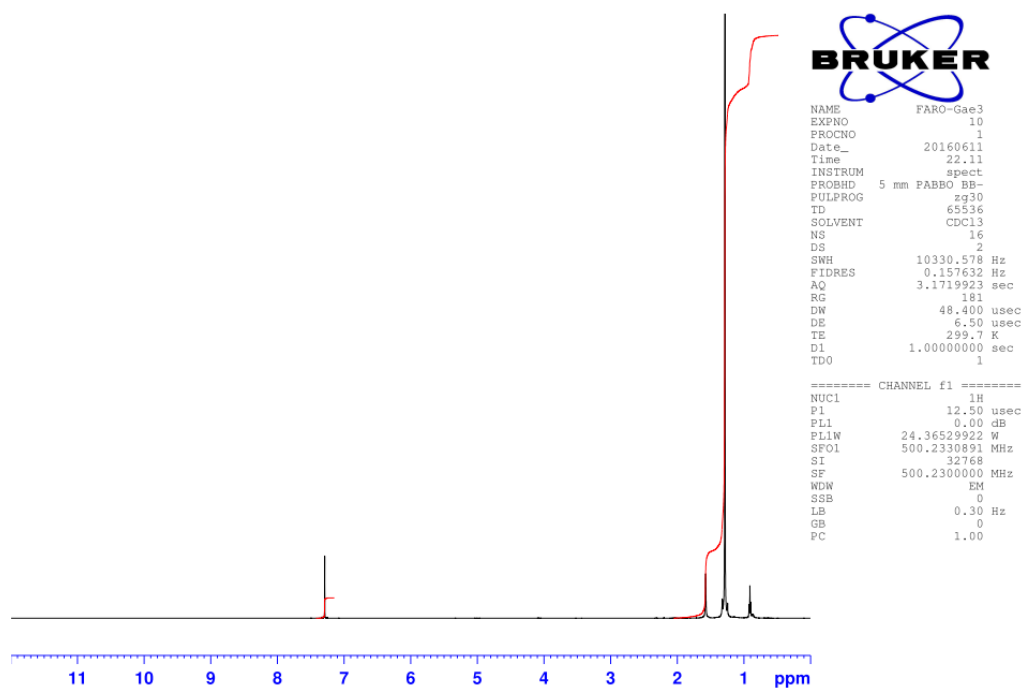

Figure S8.  $^1\text{H}$  NMR spectra of compound 1 in  $\text{CDCl}_3$

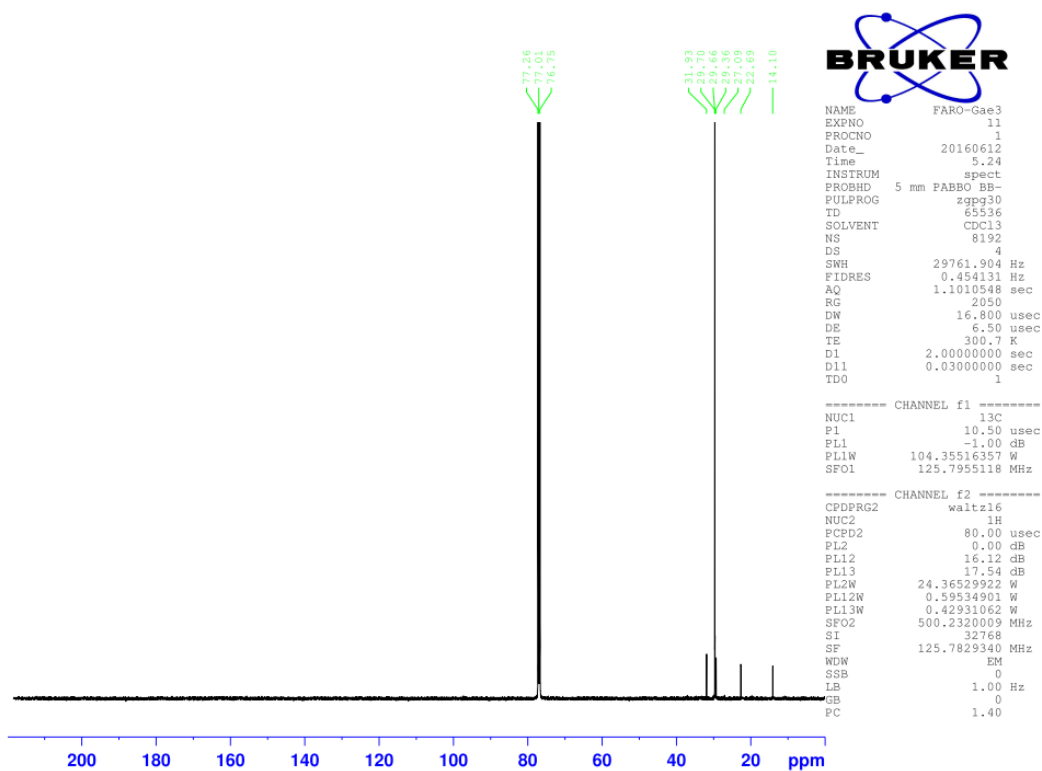

Figure S9.  $^{13}\text{C}$  NMR spectra of compound 1 in  $\text{CDCl}_3$

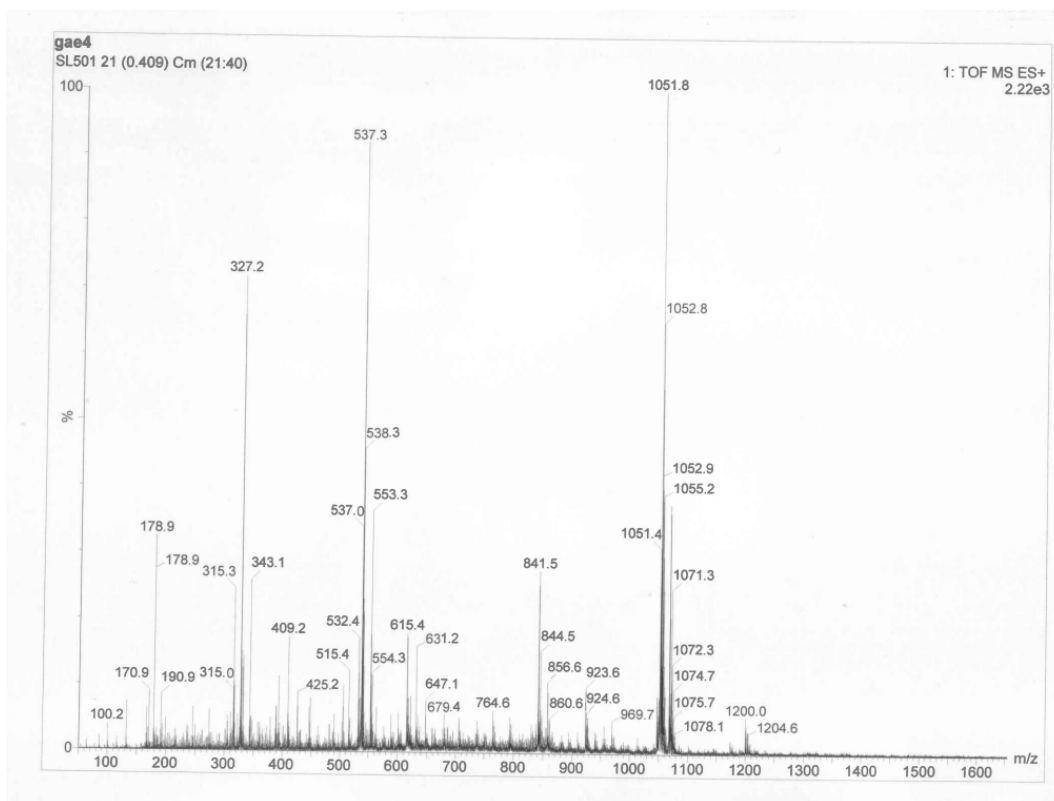

Figure S10. ESI-TOF MS+ spectrum of Compound 2

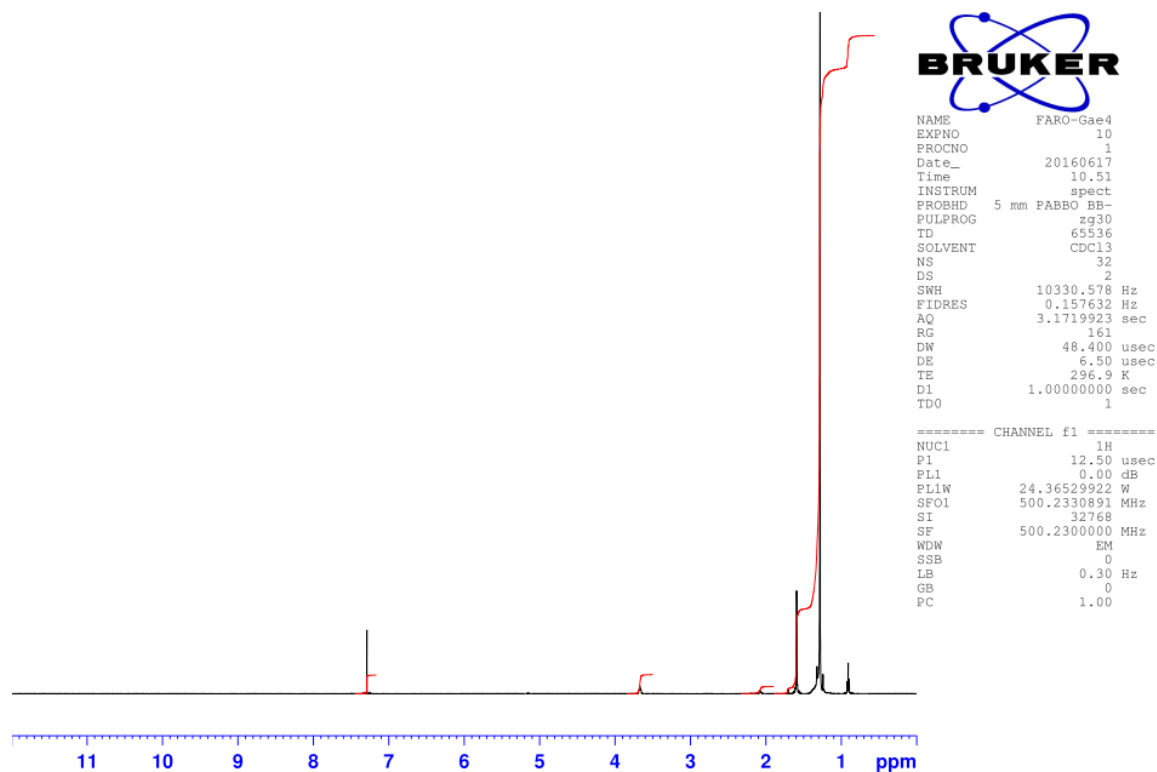Figure S11.  $^1\text{H}$  NMR spectra of compound 2 in  $\text{CDCl}_3$

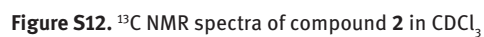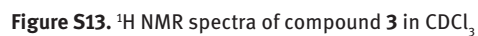

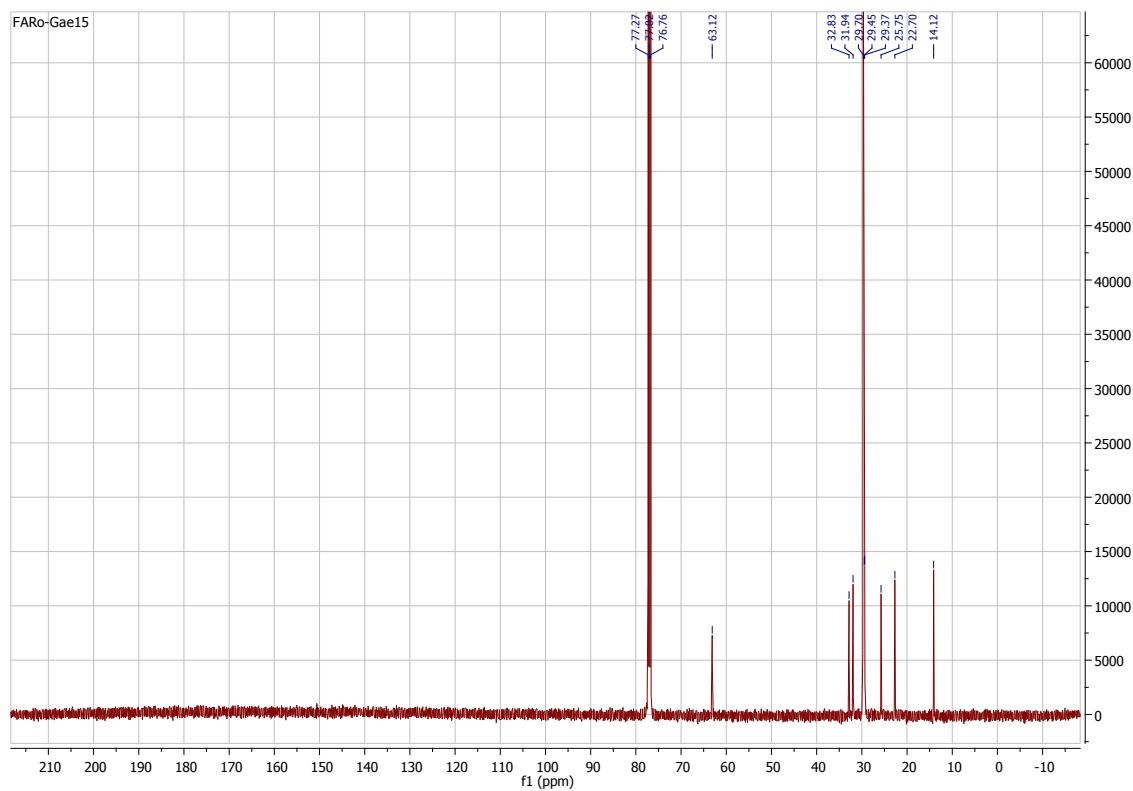

Figure S14. <sup>13</sup>C NMR spectra of compound **3** in CDCl<sub>3</sub>

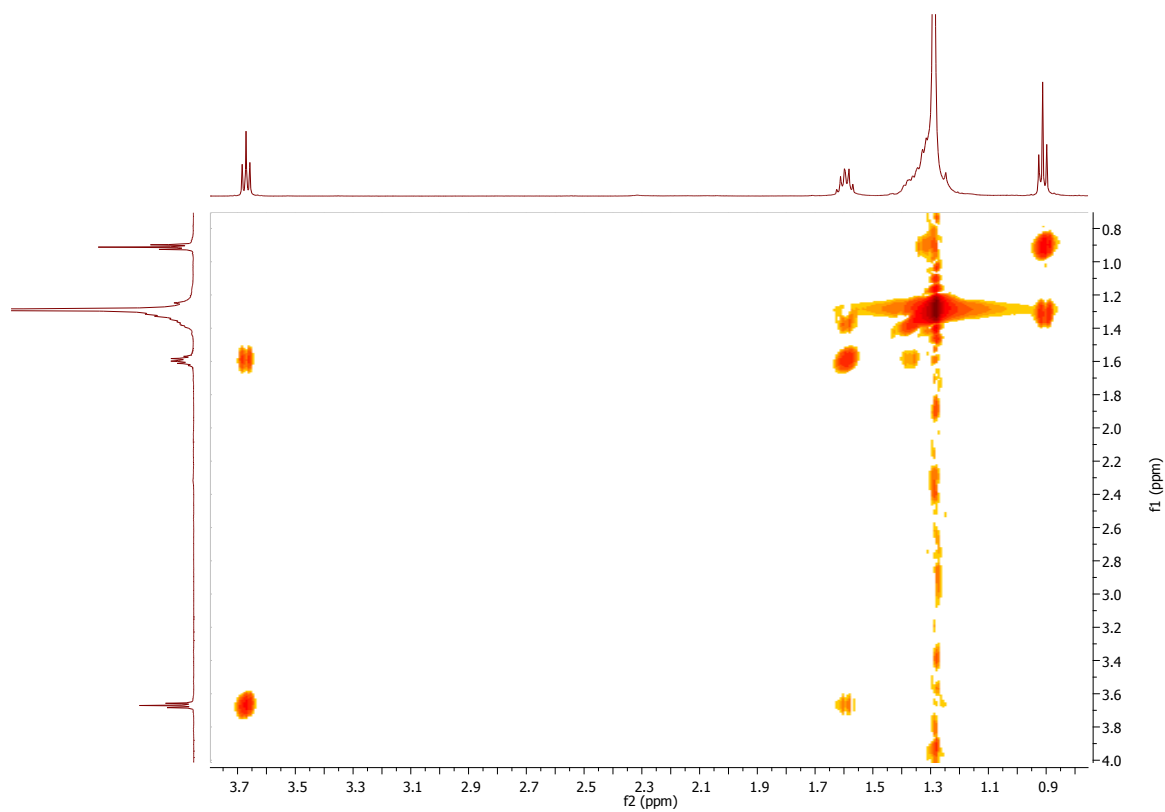

Figure S15. COSY spectra of compound **3** in CDCl<sub>3</sub>



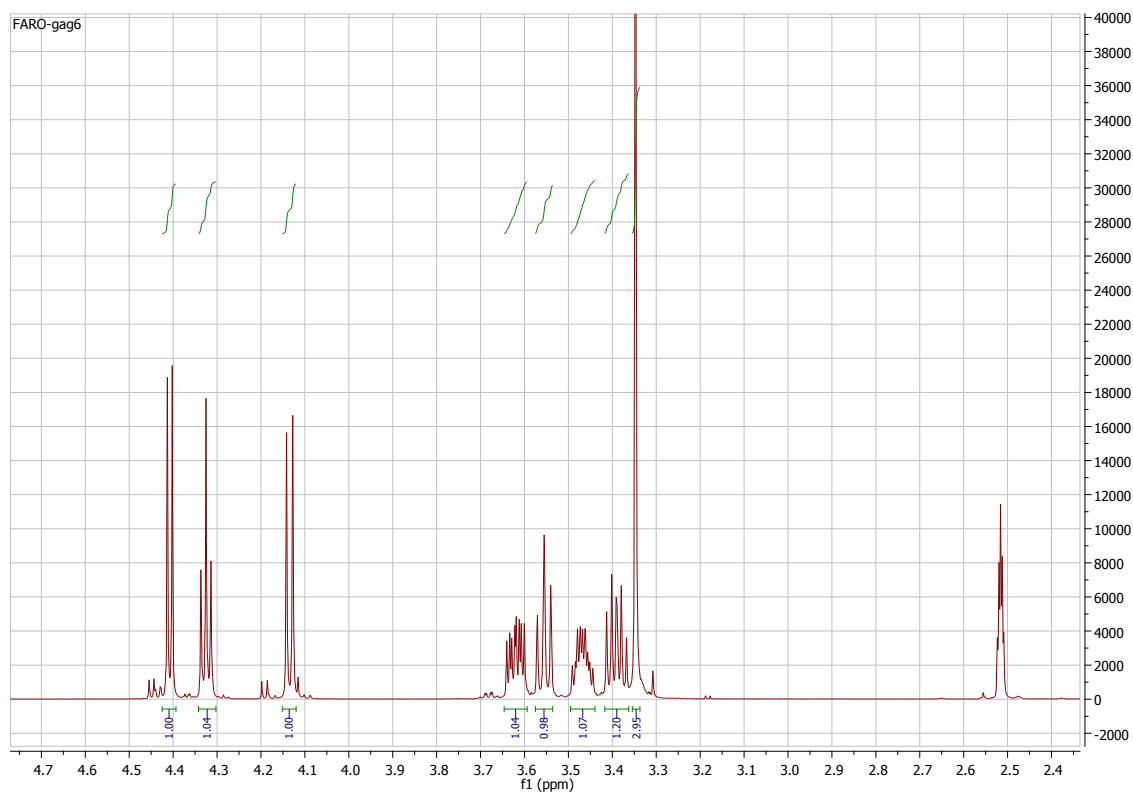

Figure S16.  $^1\text{H}$  NMR spectra of compound 5 in DMSO

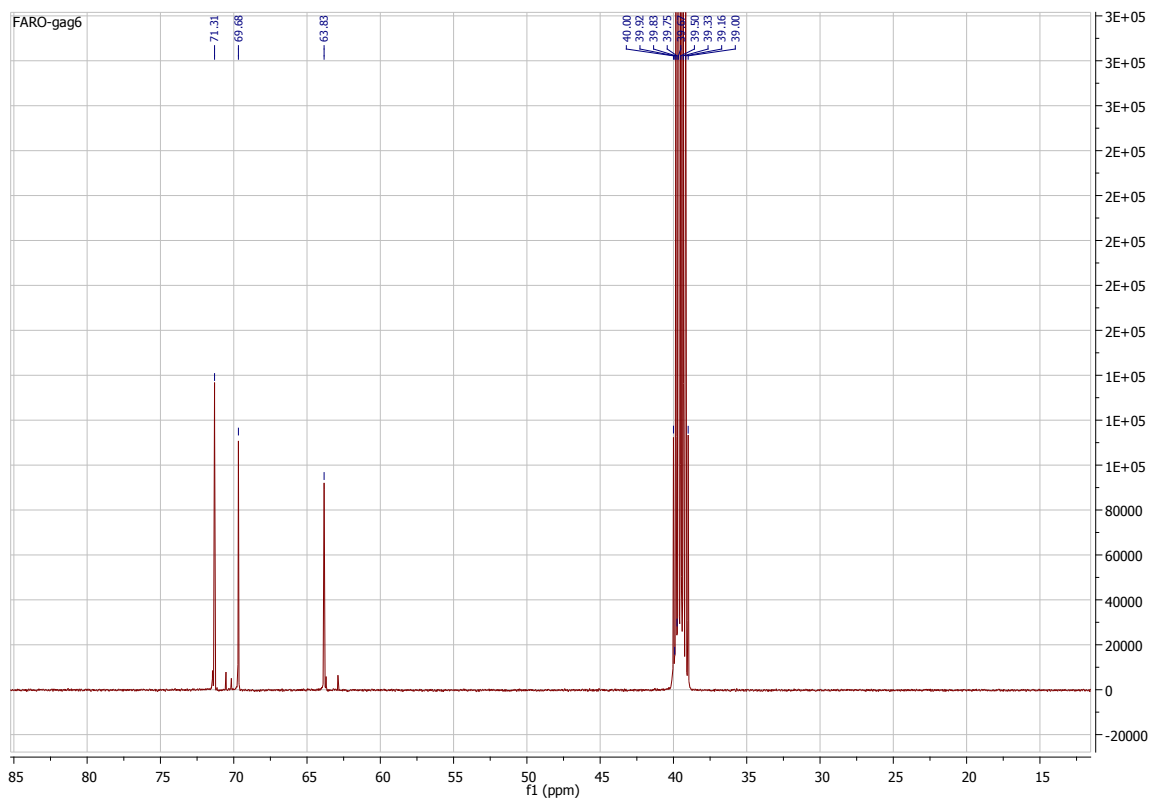

Figure S17.  $^{13}\text{C}$  NMR spectra of compound 5 in DMSO

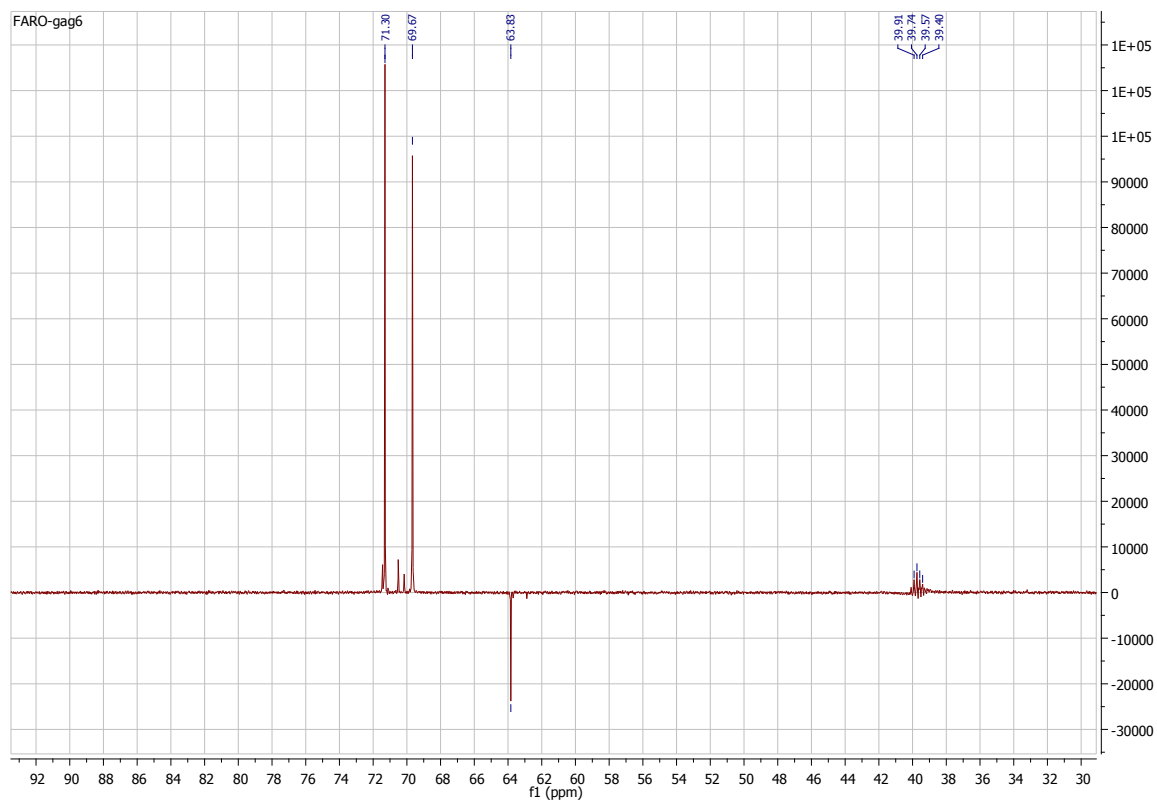

Figure S18. DEPT-135 spectra of compound 5 in DMSO

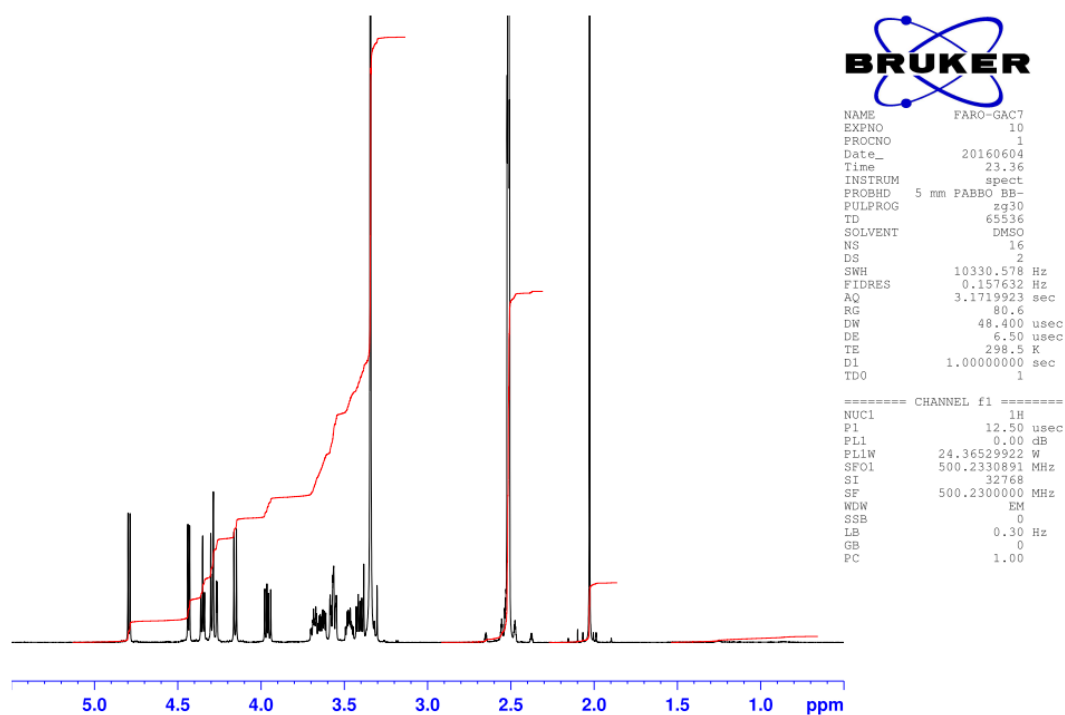Figure S19.  $^1\text{H}$  NMR spectra of compound 6 in DMSO

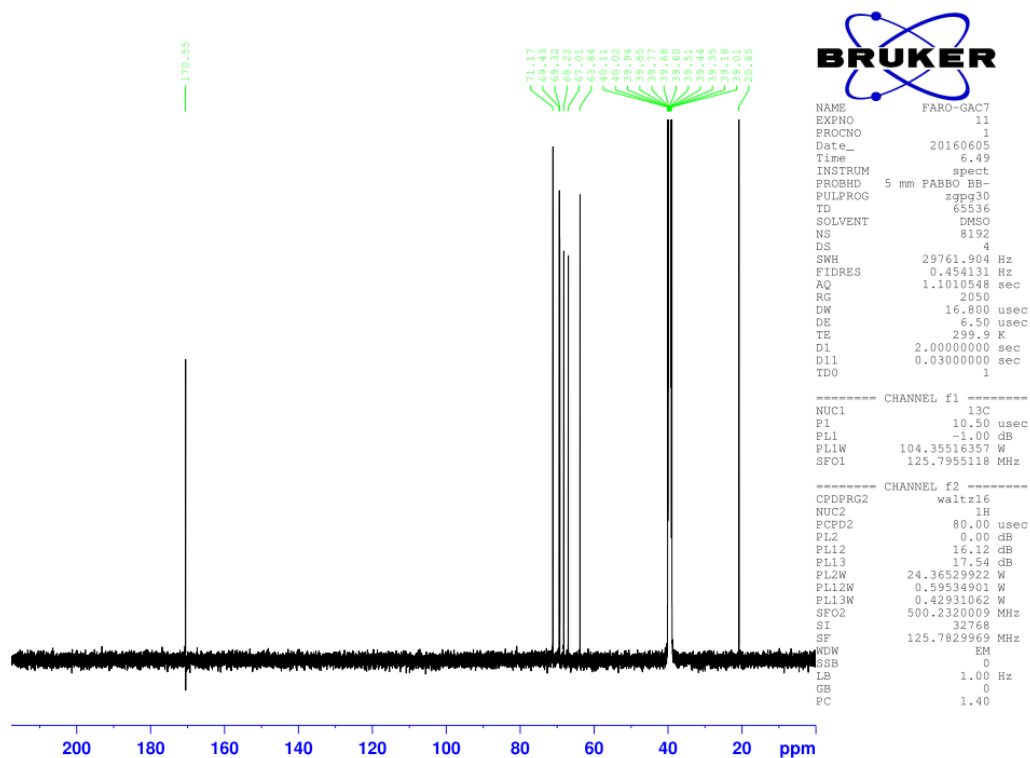Figure S20.  $^{13}\text{C}$  NMR spectra of compound 6 in DMSO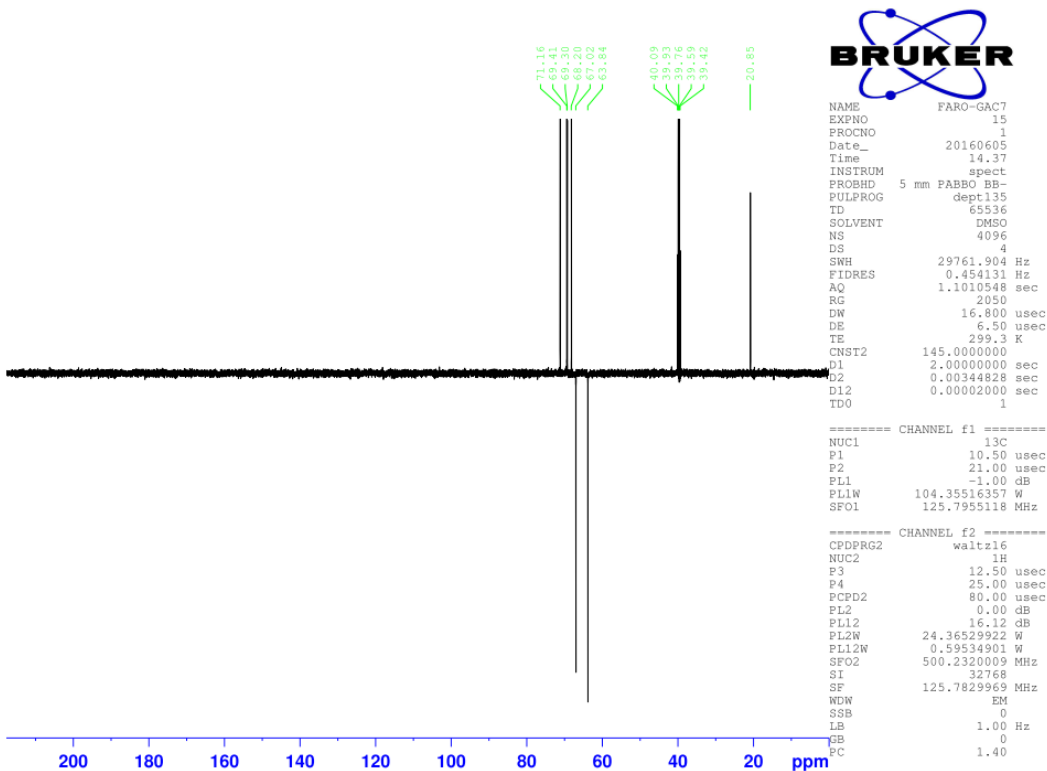

Figure S21. DEPT-135 spectra of compound 6 in DMSO

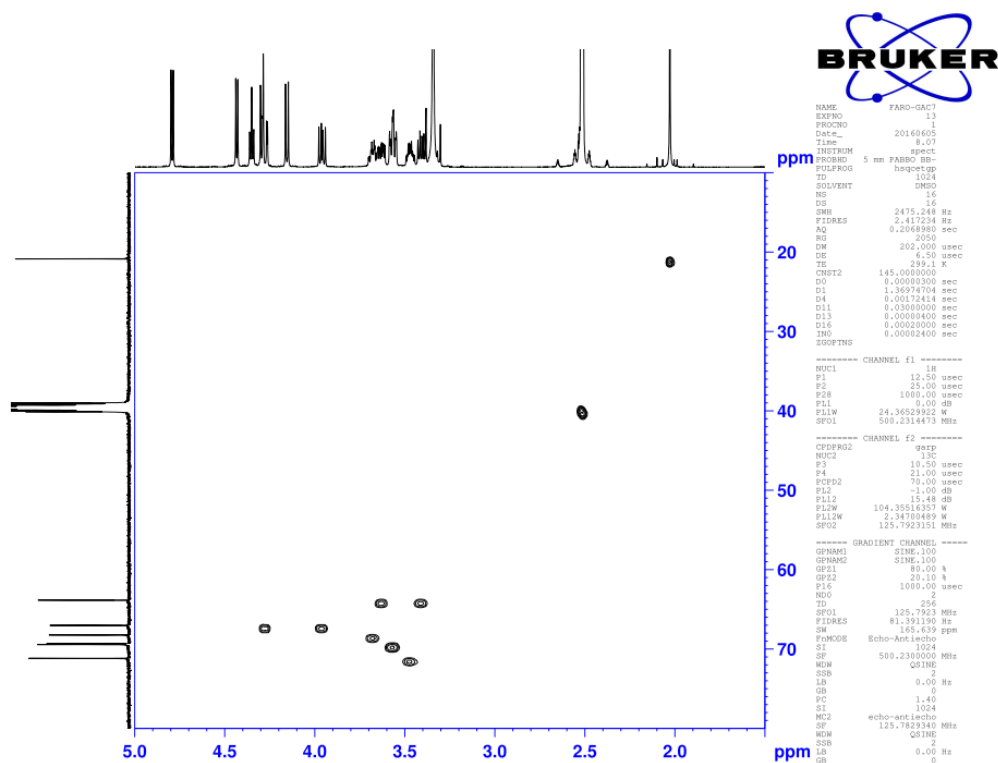

Figure S22. HSQC spectra of compound 6 in DMSO

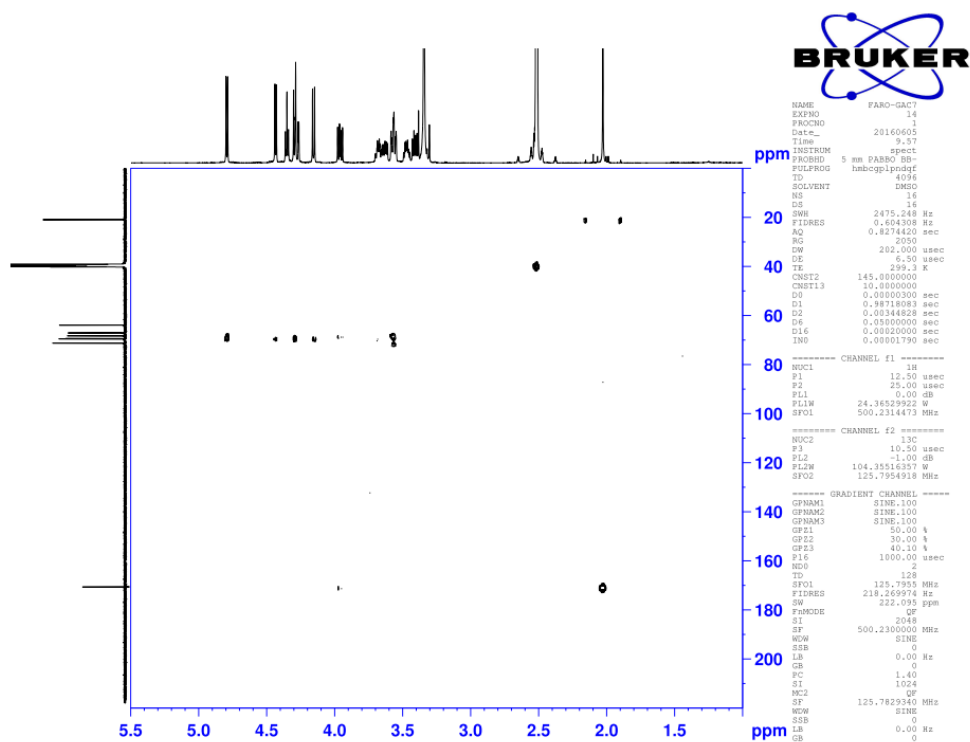

Figure S23. HMBC spectra of compound 6 in DMSO

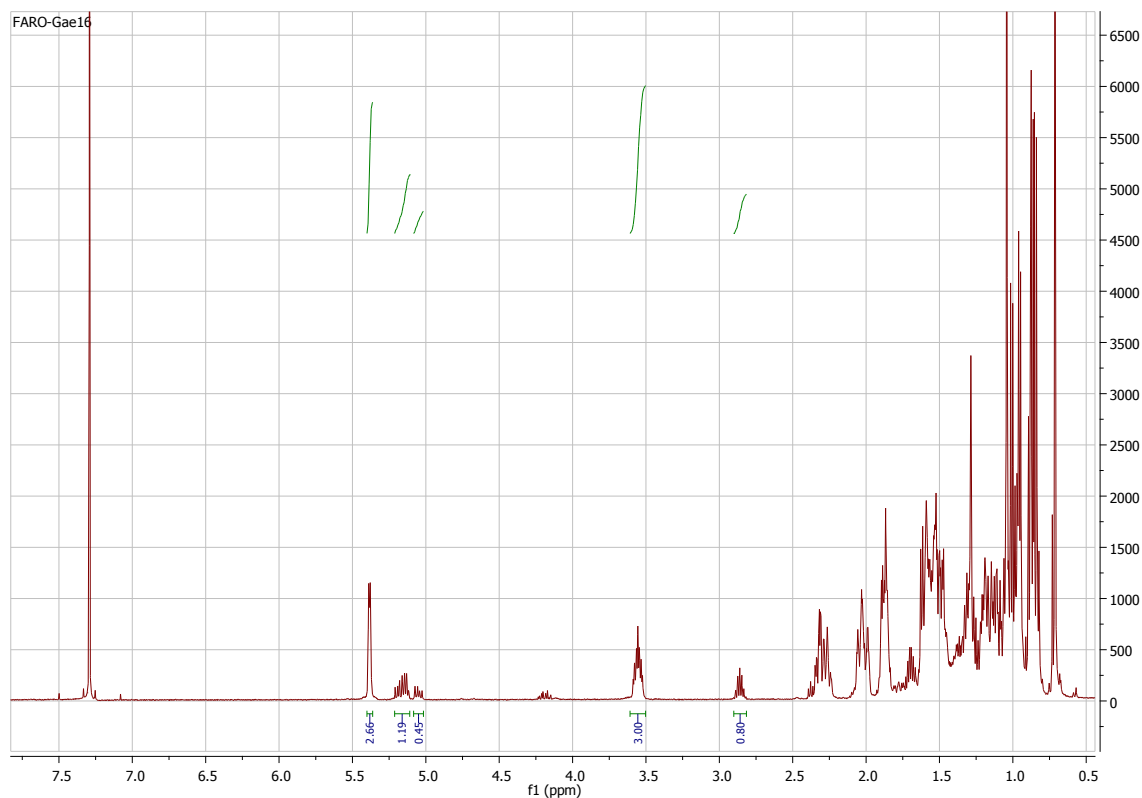

Figure S24.  $^1\text{H}$  NMR spectra of the mixture of phytosterols 7, 8 and 9 in DMSO

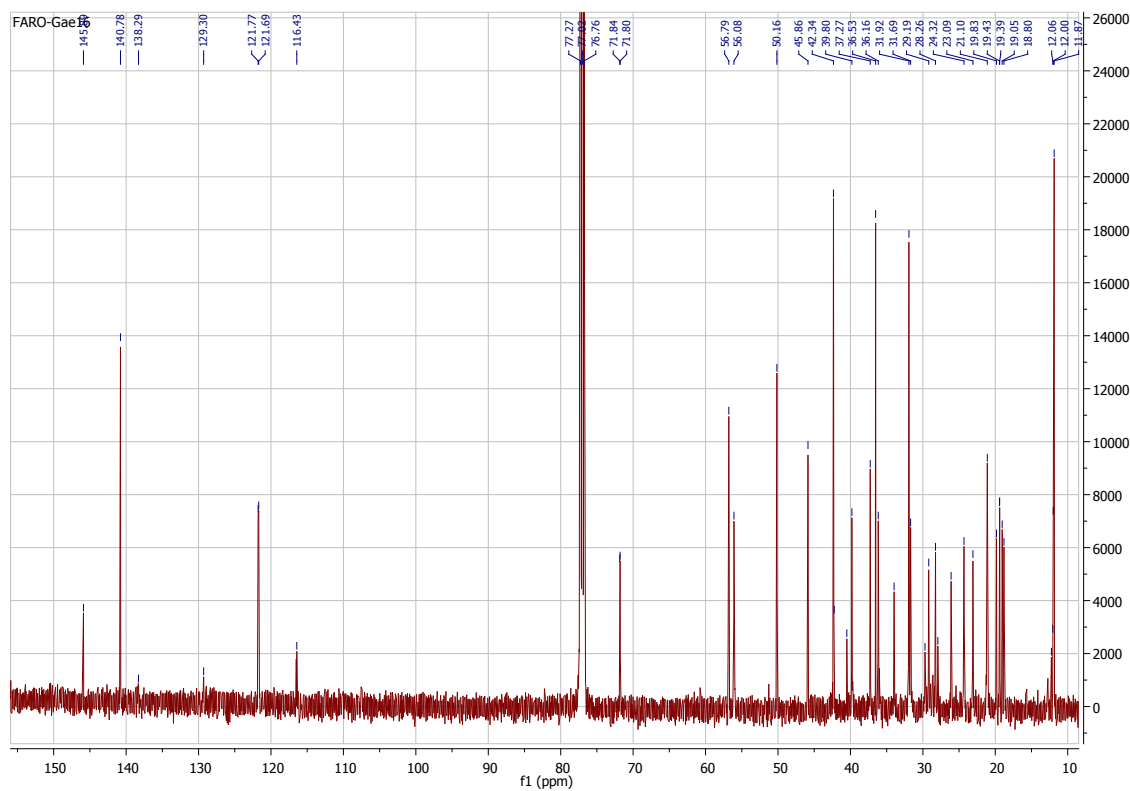

Figure S25.  $^{13}\text{C}$  NMR spectra of the mixture of phytosterols 7, 8 and 9 in DMSO
